# Supplementary material
Source: PubMed Central journal article supplement (PMC9509418)
Supplement: NIHMS1811954-supplement-1.pdf [file NIHMS1811954-supplement-1.pdf]

Supplementary Table 1. Progression to late age-related macular degeneration in the Age-Related Eye Disease Study, by person: hazard ratios associated with different levels on the modified Simplified Severity Scale, separately according to reticular pseudodrusen presence and absence.

| Modified Simplified Severity Scale levels (reference 0-1) | RPD absent            |         | RPD present           |         |
|-----------------------------------------------------------|-----------------------|---------|-----------------------|---------|
|                                                           | Hazard ratio (95% CI) | P value | Hazard ratio (95% CI) | P value |
| 2                                                         | 6.7 (5.0-8.9)         | <0.0001 | 6.3 (2.9-13.7)        | <0.0001 |
| 3                                                         | 14.0 (10.5-18.8)      | <0.0001 | 9.9 (4.7-20.5)        | <0.0001 |
| 4                                                         | 33.0 (24.8-43.9)      | <0.0001 | 15.9 (7.8-32.4)       | <0.0001 |

Abbreviations: CI=confidence interval; RPD=reticular pseudodrusen
