# Supplementary material
Source: PubMed Central journal article supplement (PMC9509418)
Supplement: NIHMS1811954-supplement-2.pdf [file NIHMS1811954-supplement-2.pdf]

Supplementary Table 2. Progression to late age-related macular degeneration in the Age-Related Eye Disease Study, by eye: hazard ratios associated with different levels on the 9-step Severity Scale, separately according to reticular pseudodrusen presence and absence.

| 9- step Severity Scale levels (reference 1-6) | RPD absent            |         | RPD present           |         |
|-----------------------------------------------|-----------------------|---------|-----------------------|---------|
|                                               | Hazard ratio (95% CI) | P value | Hazard ratio (95% CI) | P value |
| 7-8                                           | 7.9 (6.8-9.1)         | <0.0001 | 2.8 (2.1-3.8)         | <0.0001 |

Abbreviations: CI=confidence interval; RPD=reticular pseudodrusen
