# Supplementary material
Source: PubMed Central journal article supplement (PMC9509418)
Supplement: NIHMS1811954-supplement-3.pdf [file NIHMS1811954-supplement-3.pdf]

Supplementary Table 3. Progression to late age-related macular degeneration subtypes in the Age-Related Eye Disease Study 2, by person: hazard ratios associated with reticular pseudodrusen presence and different levels on the modified Simplified Severity Scale, considered simultaneously.

| Modified Simplified Severity Scale level (reference 0-2) or RPD presence (reference absent) | Geographic atrophy    |         | Neovascular AMD       |         |
|---------------------------------------------------------------------------------------------|-----------------------|---------|-----------------------|---------|
|                                                                                             | Hazard ratio (95% CI) | P value | Hazard ratio (95% CI) | P value |
| Level 3                                                                                     | 1.99 (1.18-3.37)      | 0.010   | 2.21 (1.46-3.35)      | 0.0002  |
| Level 4                                                                                     | 5.72 (3.68-8.90)      | <0.0001 | 2.50 (1.72-3.62)      | <0.0001 |
| RPD present                                                                                 | 1.55 (1.11-2.17)      | 0.010   | 0.98 (0.65-1.48)      | 0.93    |

Abbreviations: AMD=age-related macular degeneration; CI=confidence interval; RPD=reticular pseudodrusen
