# Supplementary material
Source: PubMed Central journal article supplement (PMC9509418)
Supplement: NIHMS1811954-supplement-4.pdf [file NIHMS1811954-supplement-4.pdf]

Supplementary Table 4. Progression to late age-related macular degeneration in the Age-Related Eye Disease Study 2, by eye: hazard ratios associated with reticular pseudodrusen presence and different levels on the 9-step Severity Scale, considered simultaneously.

| 9- step Severity Scale levels (reference 1-5) or RPD presence (reference absent) | Hazard ratio (95% CI) | P value |
|----------------------------------------------------------------------------------|-----------------------|---------|
| Level 6                                                                          | 1.69 (1.31-2.17)      | <0.0001 |
| Level 7                                                                          | 3.91 (3.13-4.90)      | <0.0001 |
| Level 8                                                                          | 7.63 (5.98-9.74)      | <0.0001 |
| RPD present                                                                      | 1.57 (1.31-1.89)      | <0.0001 |

Abbreviations: CI=confidence interval; RPD=reticular pseudodrusen
